# Supplementary material
Source: PubMed Central journal article supplement (PMC5836098)

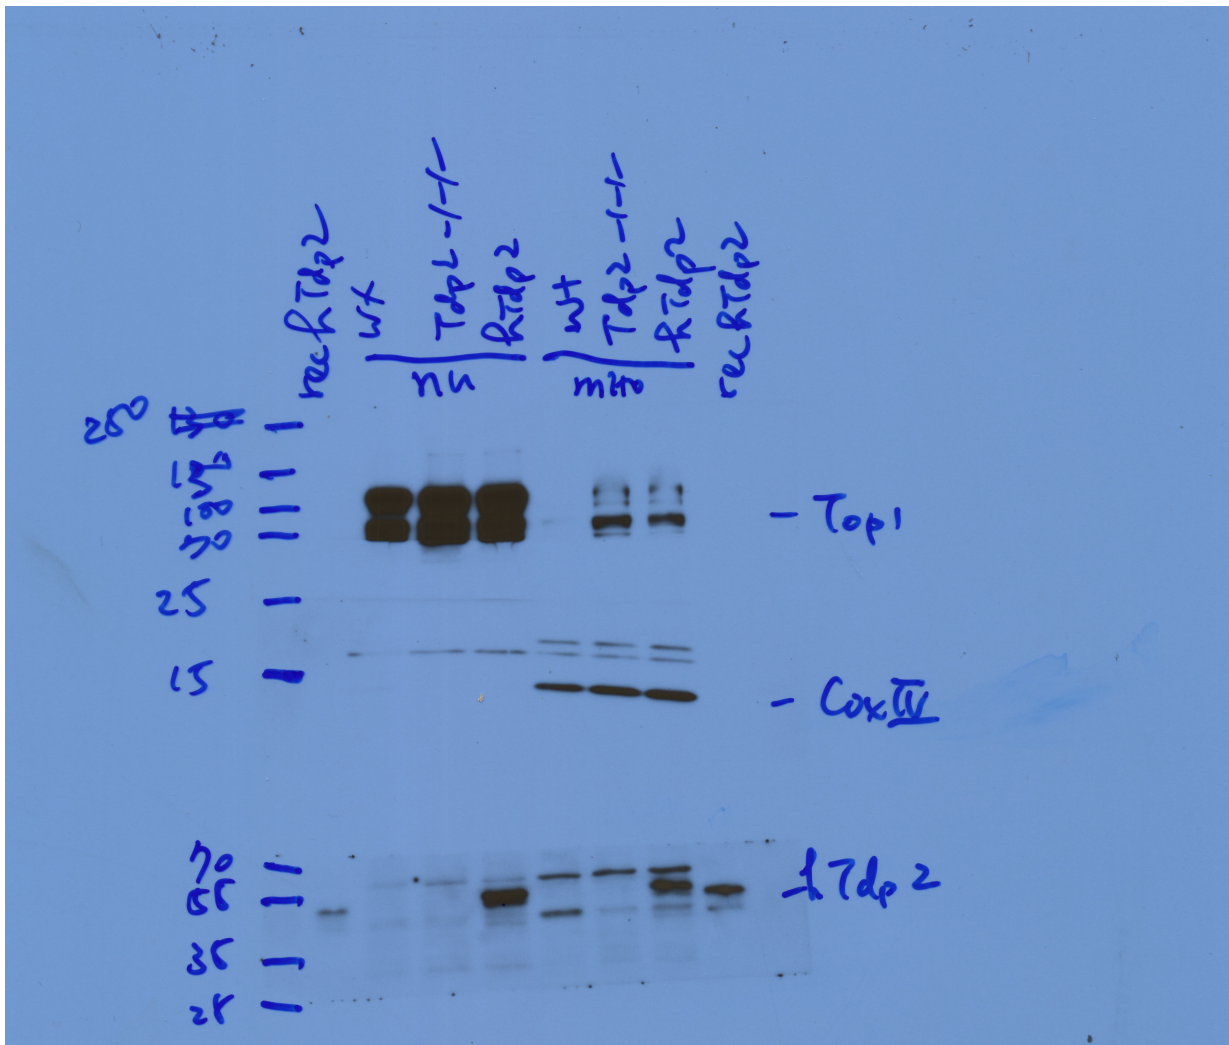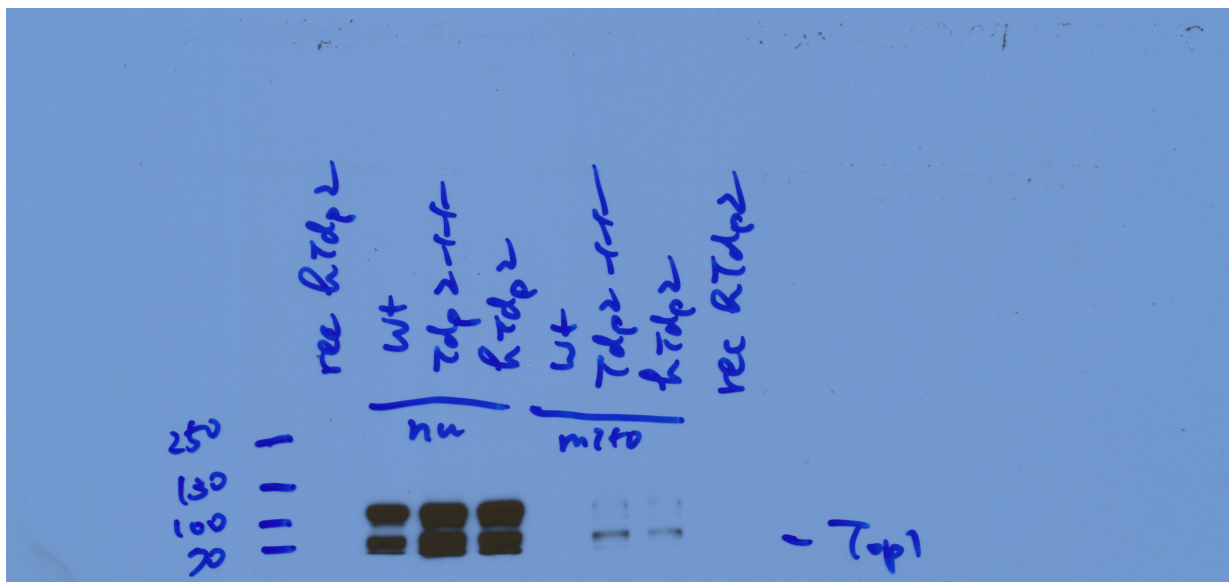

Shorter exposure

Supplement: EMBR-19-e42139-s004.pdf [file EMBR-19-e42139-s004.pdf]
